# Supplementary material for: Comparison of prognostic value of neutrophil-to-lymphocyte ratio (NLR) in patients with metastatic and non-metastatic cancers
Source: Research Square preprint supplement (doi:10.21203/rs.3.rs-6503959/v1), 2025-05-16
Supplement: Supplementary file 1 [file 08bf342ca8e4d822dcb8eb0c.pdf]

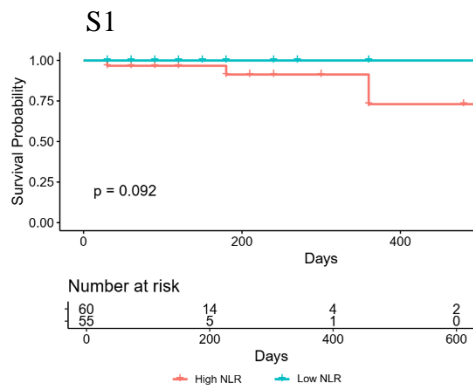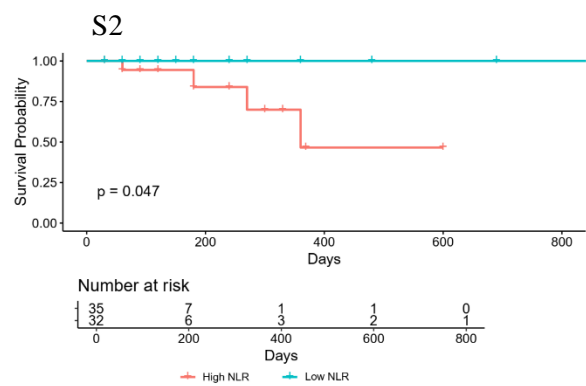

**Supplementary Figures S1, S2. Kaplan-Meier Survival Analysis according to sex based on NLR values.** S1: female, S2: male. Censoring, indicated by tick marks, is representing patients who were either lost to follow-up or remained alive at the last recorded time point. P indicates statistical significance.

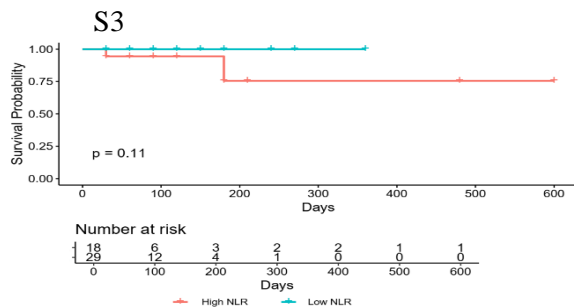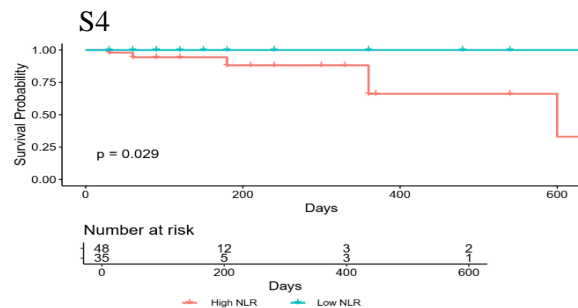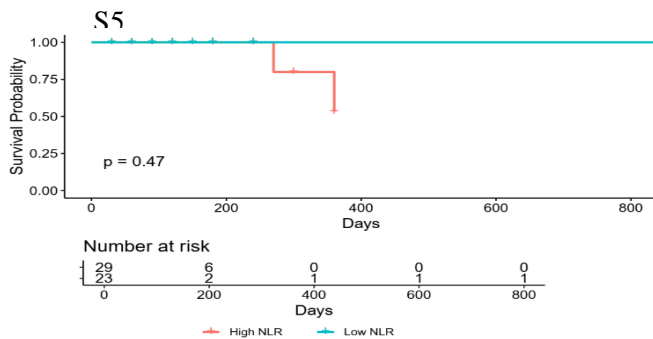

**Supplementary Figures 3-5. Kaplan-Meier Survival Analysis according to age groups based on NLR values.** S3: age group 18-40 years, S4: age group 41-60, S5: age group >60 years. Censoring, indicated by tick marks, is representing patients who were either lost to follow-up or remained alive at the last recorded time point. P indicates statistical significance.

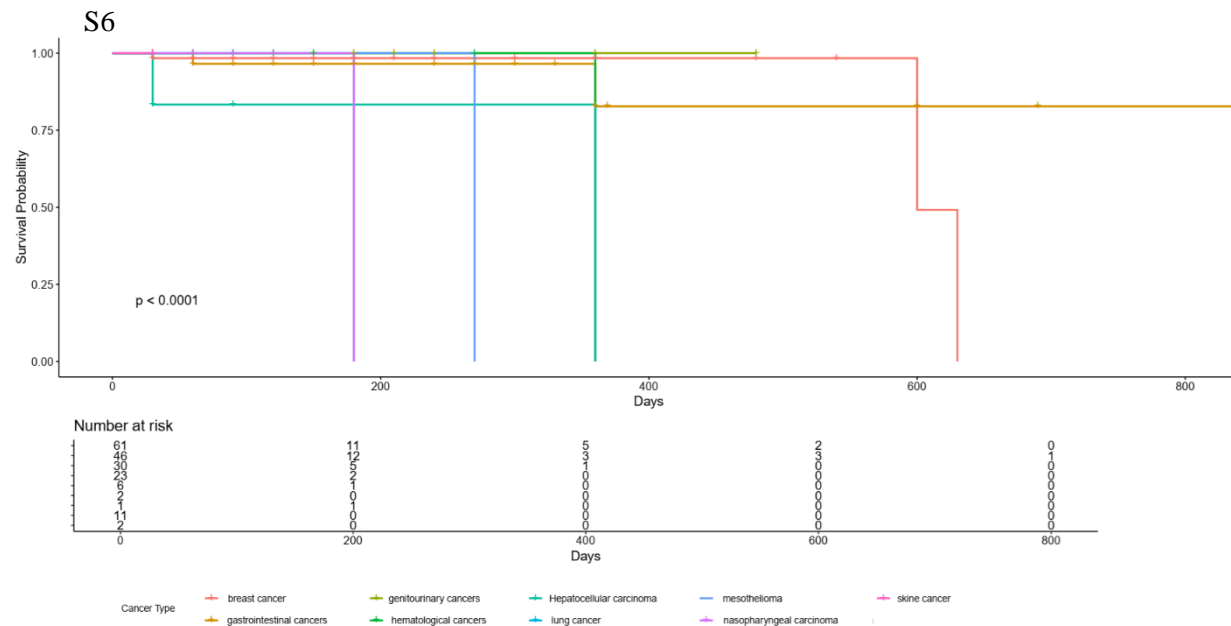

**Supplementary Fig. S6. Kaplan-Meier Survival Analysis according to cancer types.** Censoring, indicated by tick marks, is representing patients who were either lost to follow-up or remained alive at the last recorded time point. P indicates statistical significance.

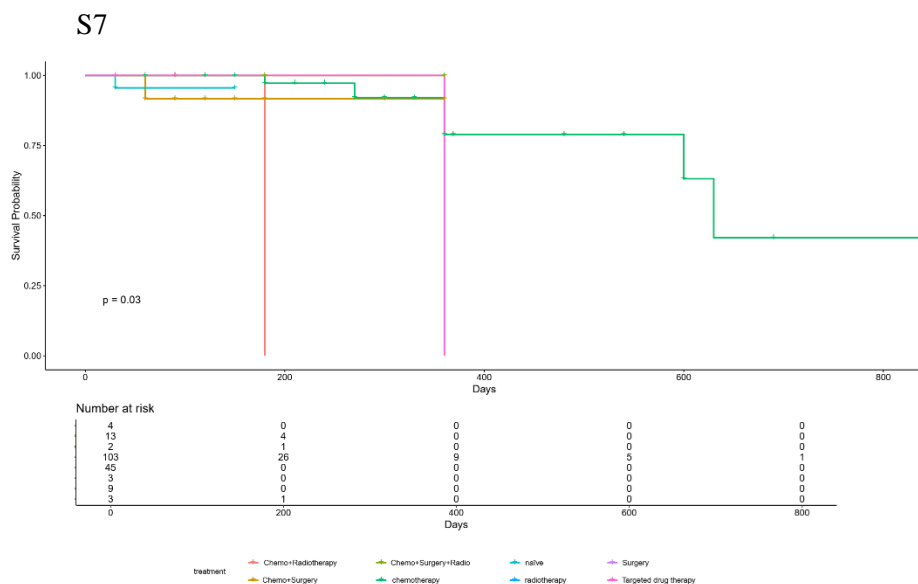

**Supplementary Fig. S7. Kaplan-Meier Survival Analysis according to treatment types.** Censoring, indicated by tick marks, is representing patients who were either lost to follow-up or remained alive at the last recorded time point. P indicates statistical significance.
